# Supplementary material
Source: publisher figshare collection journal article supplement (https://tandf.figshare.com/articles/dataset/_/5624602)
Supplement: Supplementary file 1 [file 1]

Supplemental Table S2. Change in gene expression level after aerobic treatment

| gene ID          | Product name                                                               | Accession no.  | Normalized expression ratio<br>(Aerobic/Anaerobic) |
|------------------|----------------------------------------------------------------------------|----------------|----------------------------------------------------|
| Increased (>2.0) |                                                                            |                |                                                    |
| I592_02660       | hypothetical protein                                                       | WP_010779726.1 | 41.8150                                            |
| I592_03589       | glyoxalase                                                                 | WP_010779221.1 | 32.7917                                            |
| I592_01649       | dihydrolipoyl dehydrogenase                                                | WP_010780694.1 | 29.5521                                            |
| I592_01868       | alpha-acetolactate decarboxylase                                           | WP_010780494.1 | 29.1150                                            |
| I592_01651       | pyruvate dehydrogenase E1 component subunit beta                           | WP_010780692.1 | 28.9925                                            |
| I592_01650       | dihydrolipoamide acetyltransferase                                         | WP_010780693.1 | 28.3073                                            |
| I592_01869       | acetolactate synthase%2C catabolic                                         | WP_010780493.1 | 27.9522                                            |
| I592_01652       | pyruvate dehydrogenase (acetyl-transferring) E1 component%2C alpha subunit | WP_010780691.1 | 26.6265                                            |
| I592_03691       | small integral membrane protein                                            | WP_010779119.1 | 20.9280                                            |
| I592_02659       | hypothetical protein                                                       | WP_010779727.1 | 20.6875                                            |
| I592_02674       | succinate-semialdehyde dehydrogenase                                       | WP_010779712.1 | 20.6818                                            |
| I592_01181       | extracellular solute-binding protein                                       | WP_010781156.1 | 18.2859                                            |
| I592_01182       | amino acid ABC transporter permease                                        | WP_010781155.1 | 17.5159                                            |
| I592_01161       | hypothetical protein                                                       | WP_010781174.1 | 16.4262                                            |
| I592_03692       | hypothetical protein                                                       | WP_010779118.1 | 16.3506                                            |
| I592_03874       | hypothetical protein                                                       | WP_010778936.1 | 15.5215                                            |
| I592_00396       | hypothetical protein                                                       | WP_010781910.1 | 15.0225                                            |
| I592_03690       | general stress protein                                                     | WP_010779120.1 | 14.9204                                            |
| I592_03689       | general stress protein GlsB                                                | WP_010779121.1 | 14.3660                                            |
| I592_00342       | hypothetical protein                                                       | WP_010781964.1 | 13.9505                                            |
| I592_03309       | efflux ABC transporter permease                                            | WP_010778589.1 | 13.7226                                            |
| I592_03310       | ABC transporter ATP-binding protein                                        | WP_010778588.1 | 13.6607                                            |
| I592_01836       | hypothetical protein                                                       | WP_010780526.1 | 13.5560                                            |
| I592_00667       | hypothetical protein                                                       | WP_010781647.1 | 13.5309                                            |
| I592_00853       | hypothetical protein                                                       | WP_010781469.1 | 13.2908                                            |
| I592_00161       | hypothetical protein                                                       | WP_010782129.1 | 12.9196                                            |
| I592_01264       | hypothetical protein                                                       | WP_010781074.1 | 12.8564                                            |
| I592_02701       | Pfpl family intracellular protease                                         | WP_010779685.1 | 12.8556                                            |
| I592_03283       | hypothetical protein                                                       | WP_010778615.1 | 11.7111                                            |
| I592_03537       | spx/MgsR family transcriptional regulator                                  | WP_010779273.1 | 11.6186                                            |
| I592_03873       | hypothetical protein                                                       | WP_010778937.1 | 11.4458                                            |
| I592_00318       | glycine betaine/carnitine/choline ABC transporter                          | WP_010781984.1 | 11.3388                                            |
| I592_00317       | ABC transporter permease                                                   | WP_010781985.1 | 11.3222                                            |
| I592_03037       | hypothetical protein                                                       | WP_010779380.1 | 11.2421                                            |
| I592_02545       | hypothetical protein                                                       | WP_010779841.1 | 11.0561                                            |
| I592_01479       | hypothetical protein                                                       | WP_010780861.1 | 10.9910                                            |
| I592_02558       | oxidoreductase%2C zinc-binding                                             | WP_010779828.1 | 10.9902                                            |
| I592_00429       | UIT9 transporter                                                           | WP_010781877.1 | 10.9747                                            |
| I592_03038       | peptide methionine sulfoxide reductase msrA                                | WP_010779379.1 | 10.1282                                            |
| I592_00319       | glycine betaine/carnitine/choline ABC transporter permease                 | WP_010781983.1 | 10.0448                                            |
| I592_00084       | hypothetical protein                                                       | WP_010782206.1 | 10.0200                                            |
| I592_00039       | malate dehydrogenase (oxaloacetate-decarboxylating)                        | WP_010782251.1 | 10.0123                                            |
| I592_02544       | hypothetical protein                                                       | WP_010779842.1 | 9.9649                                             |
| I592_01611       | hypothetical protein                                                       | WP_010780732.1 | 9.9231                                             |
| I592_00320       | glycine betaine/L-proline transport ATP binding subunit                    | WP_010781982.1 | 9.8884                                             |
| I592_00555       | hypothetical protein                                                       | WP_010781751.1 | 9.8335                                             |
| I592_00430       | N-acyl-D-amino-acid deacylase                                              | WP_010781876.1 | 9.8129                                             |
| I592_01790       | hypothetical protein                                                       | WP_010780571.1 | 9.8117                                             |
| I592_02546       | general stress protein                                                     | WP_010779840.1 | 9.7662                                             |
| I592_01613       | glycine betaine/carnitine/choline ABC transporter                          | WP_010780730.1 | 9.6640                                             |
| I592_03538       | hypothetical protein                                                       | WP_010779272.1 | 9.5744                                             |
| I592_01502       | pyridine nucleotide-disulfide family oxidoreductase                        | WP_010780839.1 | 9.5699                                             |
| I592_00983       | peroxiredoxin%2C Ohr subfamily                                             | WP_010781341.1 | 9.4942                                             |
| I592_00166       | hypothetical protein                                                       | WP_010782124.1 | 9.4200                                             |
| I592_03875       | hypothetical protein                                                       | WP_010778935.1 | 9.2742                                             |
| I592_01612       | hypothetical protein                                                       | WP_010780731.1 | 9.1298                                             |
| I592_01535       | NADH oxidase                                                               | WP_010780808.1 | 9.0604                                             |
| I592_01501       | 1%2C4-dihydroxy-2-naphthoate octaprenyltransferase                         | WP_010780840.1 | 8.7692                                             |
| I592_00040       | auxin efflux carrier                                                       | WP_010782250.1 | 8.6874                                             |
| I592_00167       | poly-beta-1%2C6 N-acetyl-D-glucosamine synthase                            | WP_010782123.1 | 8.6421                                             |
| I592_02945       | hypothetical protein                                                       | WP_010779473.1 | 8.5919                                             |
| I592_03588       | hypothetical protein                                                       | WP_010779222.1 | 8.2794                                             |
| I592_02649       | alkyl hydroperoxide reductase subunit C                                    | WP_010779737.1 | 8.2064                                             |
| I592_00162       | hypothetical protein                                                       | WP_010782128.1 | 8.1115                                             |
| I592_00989       | 2-dehydropantoate 2-reductase                                              | WP_010781335.1 | 8.0668                                             |
| I592_02549       | ABC transporter ATP-binding protein                                        | WP_010779837.1 | 7.9981                                             |
| I592_03806       | hypothetical protein                                                       | WP_010779004.1 | 7.8671                                             |
| I592_00428       | carbamate kinase                                                           | WP_010781878.1 | 7.7050                                             |
| I592_03809       | cof-like hydrolase                                                         | WP_010779001.1 | 7.6459                                             |
| I592_02650       | alkyl hydroperoxide reductase%2C F subunit                                 | WP_010779736.1 | 7.4746                                             |
| I592_02183       | LPXTG-domain-containing protein cell wall anchor domain                    | WP_010780192.1 | 7.4070                                             |
| I592_03808       | 8 glycosyltransferase                                                      | WP_010779002.1 | 6.9896                                             |
| I592_00038       | hypothetical protein                                                       | WP_010782252.1 | 6.9876                                             |
| I592_02550       | hypothetical protein                                                       | WP_010779836.1 | 6.7468                                             |
| I592_03202       | hypothetical protein                                                       | WP_010778696.1 | 6.7454                                             |
| I592_03521       | thiol reductant ABC exporter%2C CydC subunit                               | WP_010779289.1 | 6.7263                                             |
| I592_03601       | hypothetical protein                                                       | WP_010779209.1 | 6.6975                                             |
| I592_03520       | thiol reductant ABC exporter%2C CydD subunit                               | WP_010779290.1 | 6.6820                                             |
| I592_03519       | cytochrome d ubiquinol oxidase%2C subunit II                               | WP_010779291.1 | 6.6164                                             |
| I592_03575       | glycerol kinase                                                            | WP_010779235.1 | 6.5801                                             |
| I592_02184       | hypothetical protein                                                       | WP_010780191.1 | 6.5217                                             |

|            |                                                             |                |        |
|------------|-------------------------------------------------------------|----------------|--------|
| 1592_02896 | hypothetical protein                                        | WP_010779522.1 | 6.4627 |
| 1592_03518 | cytochrome d ubiquinol oxidase%2C subunit I                 | WP_010779292.1 | 6.4607 |
| 1592_00337 | hypothetical protein                                        | WP_010781967.1 | 6.4539 |
| 1592_03526 | hypothetical protein                                        | WP_010779284.1 | 6.4163 |
| 1592_02468 | hypothetical protein                                        | WP_010779916.1 | 6.3172 |
| 1592_02897 | hypothetical protein                                        | WP_010779521.1 | 6.2696 |
| 1592_02089 | superoxide dismutase [Fe]                                   | WP_010780284.1 | 6.1206 |
| 1592_02943 | UDP-N-acetylglucosamine 2-epimerase                         | WP_010779475.1 | 6.0560 |
| 1592_03702 | deoxyribodipyrimidine photolyase                            | WP_010779108.1 | 5.9932 |
| 1592_00185 | large conductance mechanosensitive channel protein          | WP_010782105.1 | 5.9665 |
| 1592_02938 | hypothetical protein                                        | WP_010779480.1 | 5.9374 |
| 1592_03609 | hypothetical protein                                        | WP_010779201.1 | 5.8860 |
| 1592_03587 | hypothetical protein                                        | WP_010779223.1 | 5.8788 |
| 1592_00988 | general stress protein GlsB                                 | WP_010781336.1 | 5.8590 |
| 1592_03556 | hypothetical protein                                        | WP_010779254.1 | 5.8414 |
| 1592_02307 | NADH-flavin reductase                                       | WP_010780072.1 | 5.8309 |
| 1592_01508 | hypothetical protein                                        | WP_010780833.1 | 5.7710 |
| 1592_02185 | hypothetical protein                                        | WP_010780190.1 | 5.7228 |
| 1592_00278 | glutamate-cysteine ligase/gamma-glutamylcysteine synthetase | WP_010782024.1 | 5.6182 |
| 1592_00877 | hypothetical protein                                        | WP_010781445.1 | 5.5637 |
| 1592_03610 | hypothetical protein                                        | WP_010779200.1 | 5.5350 |
| 1592_00401 | LPXTG-domain-containing protein cell wall anchor domain     | WP_010781905.1 | 5.5309 |
| 1592_01500 | hypothetical protein                                        | WP_010780841.1 | 5.4808 |
| 1592_02564 | metallo-beta-lactamase                                      | WP_010779822.1 | 5.4745 |
| 1592_01750 | hypothetical protein                                        | WP_010780593.1 | 5.4695 |
| 1592_01388 | hypothetical protein                                        | WP_010780951.1 | 5.4159 |
| 1592_03302 | hypothetical protein                                        | WP_010778596.1 | 5.3702 |
| 1592_03911 | hypothetical protein                                        | WP_010778899.1 | 5.3313 |
| 1592_02947 | hypothetical protein                                        | WP_010779471.1 | 5.3211 |
| 1592_02648 | LPXTG-domain-containing protein cell wall anchor domain     | WP_010779738.1 | 5.3164 |
| 1592_02946 | hypothetical protein                                        | WP_010779472.1 | 5.2976 |
| 1592_00684 | PTS system mannose/fructose/sorbose-specific IIB component  | WP_010781630.1 | 5.2769 |
| 1592_02038 | hypothetical protein                                        | WP_010780331.1 | 5.2734 |
| 1592_01714 | hypothetical protein                                        | WP_010780629.1 | 5.2657 |
| 1592_01045 | hypothetical protein                                        | WP_010781282.1 | 5.2295 |
| 1592_03126 | hypothetical protein                                        | WP_010778773.1 | 5.2079 |
| 1592_02958 | aspartate-alanine antiporter                                | WP_010779460.1 | 5.1284 |
| 1592_02944 | hypothetical protein                                        | WP_010779474.1 | 5.1282 |
| 1592_00120 | hypothetical protein                                        | WP_010782170.1 | 5.1171 |
| 1592_00453 | myosin-crossreactive antigen                                | WP_010781853.1 | 5.0943 |
| 1592_01904 | PTS system cellobiose-specific IIA componenent              | WP_010780458.1 | 5.0921 |
| 1592_03828 | hypothetical protein                                        | WP_010778982.1 | 5.0832 |
| 1592_00466 | peptide-methionine (S)-S-oxide reductase                    | WP_010781840.1 | 5.0681 |
| 1592_03571 | dihydroxyacetone kinase%2C phosphotransfer subunit          | WP_010779239.1 | 5.0356 |
| 1592_03807 | hypothetical protein                                        | WP_010779003.1 | 4.9201 |
| 1592_02078 | hypothetical protein                                        | WP_010780294.1 | 4.9008 |
| 1592_03488 | hypothetical protein                                        | WP_010779322.1 | 4.8735 |
| 1592_03326 | hypothetical protein                                        | WP_010778572.1 | 4.8291 |
| 1592_03083 | hypothetical protein                                        | WP_010778816.1 | 4.8279 |
| 1592_01445 | phytoene desaturase                                         | WP_010780895.1 | 4.8105 |
| 1592_03910 | hypothetical protein                                        | WP_010778900.1 | 4.7446 |
| 1592_02559 | hypothetical protein                                        | WP_010779827.1 | 4.7425 |
| 1592_01747 | elongation factor Tu                                        | WP_010780596.1 | 4.7320 |
| 1592_00354 | short chain dehydrogenase/reductase family oxidoreductase   | WP_010781952.1 | 4.7061 |
| 1592_02044 | hypothetical protein                                        | WP_010780325.1 | 4.7004 |
| 1592_03912 | hypothetical protein                                        | WP_010778898.1 | 4.6841 |
| 1592_00467 | hypothetical protein                                        | WP_010781839.1 | 4.6776 |
| 1592_03760 | hypothetical protein                                        | WP_010779050.1 | 4.6763 |
| 1592_02732 | hypothetical protein                                        | WP_010779654.1 | 4.6423 |
| 1592_00789 | hypothetical protein                                        | WP_010781529.1 | 4.6312 |
| 1592_03510 | tryptophan synthase%2C alpha subunit                        | WP_010779300.1 | 4.6274 |
| 1592_00425 | hypothetical protein                                        | WP_010781881.1 | 4.6068 |
| 1592_03344 | hypothetical protein                                        | WP_010778554.1 | 4.5987 |
| 1592_01446 | hypothetical protein                                        | WP_010780894.1 | 4.5575 |
| 1592_01522 | glyceraldehyde-3-phosphate dehydrogenase                    | WP_010780821.1 | 4.5561 |
| 1592_00043 | pyruvate oxidase                                            | WP_010782247.1 | 4.5416 |
| 1592_03311 | hypothetical protein                                        | WP_010778587.1 | 4.5386 |
| 1592_00852 | hypothetical protein                                        | WP_010781470.1 | 4.5066 |
| 1592_01905 | transcriptional antiterminator bglG                         | WP_010780457.1 | 4.4867 |
| 1592_03573 | dihydroxyacetone kinase%2C DhaK subunit                     | WP_010779237.1 | 4.4827 |
| 1592_03503 | hypothetical protein                                        | WP_010779307.1 | 4.4230 |
| 1592_00717 | hypothetical protein                                        | WP_010781599.1 | 4.3604 |
| 1592_03902 | hypothetical protein                                        | WP_010778908.1 | 4.3506 |
| 1592_03574 | MIP family channel protein                                  | WP_010779236.1 | 4.3480 |
| 1592_00347 | 8-amino-7-oxononanoate synthase                             | WP_010781959.1 | 4.3320 |
| 1592_01214 | cytochrome P450                                             | WP_010781123.1 | 4.3224 |
| 1592_01447 | hypothetical protein                                        | WP_010780893.1 | 4.3186 |
| 1592_00074 | hypothetical protein                                        | WP_010782216.1 | 4.2777 |
| 1592_02070 | cyclopropane-fatty-acyl-phospholipid synthase               | WP_010780300.1 | 4.2738 |
| 1592_03608 | LPXTG-domain-containing protein cell wall anchor domain     | WP_010779202.1 | 4.2680 |
| 1592_00851 | hypothetical protein                                        | WP_010781471.1 | 4.2403 |
| 1592_00405 | hypothetical protein                                        | WP_010781901.1 | 4.2332 |
| 1592_03576 | alpha-glycerophosphate oxidase                              | WP_010779234.1 | 4.2219 |
| 1592_02469 | hypothetical protein                                        | WP_010779915.1 | 4.2061 |
| 1592_00408 | hypothetical protein                                        | WP_010781898.1 | 4.1844 |
| 1592_03084 | hypothetical protein                                        | WP_010778815.1 | 4.1808 |

|            |                                                               |                |        |
|------------|---------------------------------------------------------------|----------------|--------|
| 1592_00413 | pyridine nucleotide-disulfide oxidoreductase                  | WP_010781893.1 | 4.1605 |
| 1592_03757 | hypothetical protein                                          | WP_010779053.1 | 4.1325 |
| 1592_00790 | apurinic endonuclease (APN1)                                  | WP_010781528.1 | 4.1267 |
| 1592_00403 | hypothetical protein                                          | WP_010781903.1 | 4.1205 |
| 1592_03572 | dihydroxyacetone kinase%2C L subunit                          | WP_010779238.1 | 4.1057 |
| 1592_00348 | NAD-dependent nucleoside-diphosphate-sugar epimerase          | WP_010781958.1 | 4.0943 |
| 1592_02092 | hypothetical protein                                          | WP_010780281.1 | 4.0896 |
| 1592_02934 | hypothetical protein                                          | WP_010779484.1 | 4.0865 |
| 1592_02935 | hypothetical protein                                          | WP_010779483.1 | 4.0852 |
| 1592_01531 | hypothetical protein                                          | WP_010780812.1 | 4.0654 |
| 1592_00407 | hypothetical protein                                          | WP_010781899.1 | 4.0175 |
| 1592_01915 | hypothetical protein                                          | WP_010780447.1 | 4.0062 |
| 1592_03345 | hypothetical protein                                          | WP_010778553.1 | 4.0008 |
| 1592_01719 | hypothetical protein                                          | WP_010780624.1 | 3.9970 |
| 1592_02959 | aspartate 4-decarboxylase                                     | WP_010779459.1 | 3.9967 |
| 1592_00426 | hypothetical protein                                          | WP_010781880.1 | 3.9792 |
| 1592_01751 | ABC transporter permease                                      | WP_010780592.1 | 3.9770 |
| 1592_01598 | hypothetical protein                                          | WP_010780745.1 | 3.9647 |
| 1592_02043 | hypothetical protein                                          | WP_010780326.1 | 3.9550 |
| 1592_03611 | hypothetical protein                                          | WP_010779199.1 | 3.9519 |
| 1592_03876 | hypothetical protein                                          | WP_010778934.1 | 3.9386 |
| 1592_02683 | hypothetical protein                                          | WP_010779703.1 | 3.8714 |
| 1592_00402 | hypothetical protein                                          | WP_010781904.1 | 3.8637 |
| 1592_02514 | hypothetical protein                                          | WP_010779872.1 | 3.8421 |
| 1592_03619 | hypothetical protein                                          | WP_010779191.1 | 3.8221 |
| 1592_00718 | GNAT family acetyltransferase                                 | WP_010781598.1 | 3.8002 |
| 1592_00991 | N-acetylmuramic acid 6-phosphate etherase 2                   | WP_010781333.1 | 3.7832 |
| 1592_03920 | hypothetical protein                                          | WP_010778890.1 | 3.7829 |
| 1592_02682 | hypothetical protein                                          | WP_010779704.1 | 3.7707 |
| 1592_00170 | hypothetical protein                                          | WP_010782120.1 | 3.7682 |
| 1592_01489 | nitroreductase                                                | WP_010780852.1 | 3.7678 |
| 1592_00171 | hypothetical protein                                          | WP_010782119.1 | 3.7670 |
| 1592_01145 | hypothetical protein                                          | WP_010781188.1 | 3.7573 |
| 1592_02702 | hypothetical protein                                          | WP_010779684.1 | 3.7350 |
| 1592_03121 | hypothetical protein                                          | WP_010778778.1 | 3.7220 |
| 1592_02371 | hypothetical protein                                          | WP_010780011.1 | 3.7218 |
| 1592_01208 | lactoylglutathione lyase                                      | WP_010781129.1 | 3.7058 |
| 1592_00927 | oxidoreductase%2C aldo/keto reductase                         | WP_010781395.1 | 3.7042 |
| 1592_01974 | hypothetical protein                                          | WP_010780394.1 | 3.6940 |
| 1592_03607 | hypothetical protein                                          | WP_010779203.1 | 3.6854 |
| 1592_00322 | calcium-translocating P-type ATPase%2C PMCA-type              | WP_010781980.1 | 3.6829 |
| 1592_00119 | hypothetical protein                                          | WP_010782171.1 | 3.6695 |
| 1592_01177 | branched-chain amino acid transport system II carrier protein | WP_010781160.1 | 3.6398 |
| 1592_01748 | hypothetical protein                                          | WP_010780595.1 | 3.6194 |
| 1592_02572 | hypothetical protein                                          | WP_010779814.1 | 3.6163 |
| 1592_00415 | hypothetical protein                                          | WP_010781891.1 | 3.6069 |
| 1592_02680 | hypothetical protein                                          | WP_010779706.1 | 3.5665 |
| 1592_00400 | hypothetical protein                                          | WP_010781906.1 | 3.5273 |
| 1592_02179 | electron transport complex%2C rnfabcde type%2C G subunit      | WP_010780196.1 | 3.5124 |
| 1592_02612 | membrane protein                                              | WP_010779774.1 | 3.5073 |
| 1592_00414 | hypothetical protein                                          | WP_010781892.1 | 3.4984 |
| 1592_03921 | hypothetical protein                                          | WP_010778889.1 | 3.4924 |
| 1592_02681 | hypothetical protein                                          | WP_010779705.1 | 3.4728 |
| 1592_03904 | hypothetical protein                                          | WP_010778906.1 | 3.4618 |
| 1592_00399 | hypothetical protein                                          | WP_010781907.1 | 3.4509 |
| 1592_01480 | hypothetical protein                                          | WP_010780860.1 | 3.4489 |
| 1592_03903 | YegS//BmrU family lipid kinase                                | WP_010778907.1 | 3.4247 |
| 1592_02872 | hypothetical protein                                          | WP_010779546.1 | 3.4093 |
| 1592_01597 | hypothetical protein                                          | WP_010780746.1 | 3.3989 |
| 1592_00878 | major facilitator superfamily transporter                     | WP_010781444.1 | 3.3908 |
| 1592_02651 | spx/MgsR family transcriptional regulator                     | WP_010779735.1 | 3.3820 |
| 1592_03046 | glutathione-disulfide reductase                               | WP_010779371.1 | 3.3565 |
| 1592_00125 | hypothetical protein                                          | WP_010782165.1 | 3.3500 |
| 1592_02400 | hypothetical protein                                          | WP_010779982.1 | 3.3484 |
| 1592_00658 | ferredoxin-NADP reductase                                     | WP_010781652.1 | 3.3414 |
| 1592_02480 | lipoyltransferase and lipoate-protein ligase                  | WP_010779904.1 | 3.3369 |
| 1592_00173 | hypothetical protein                                          | WP_010782117.1 | 3.3208 |
| 1592_00533 | hypothetical protein                                          | WP_010781773.1 | 3.3200 |
| 1592_01743 | UvrABC system protein B                                       | WP_010780600.1 | 3.3141 |
| 1592_01872 | hypothetical protein                                          | WP_010780490.1 | 3.3080 |
| 1592_03195 | hypothetical protein                                          | WP_010778703.1 | 3.2935 |
| 1592_02966 | hypothetical protein                                          | WP_010779452.1 | 3.2901 |
| 1592_01742 | UvrABC system protein A                                       | WP_010780601.1 | 3.2783 |
| 1592_02838 | hypothetical protein                                          | WP_010779580.1 | 3.2751 |
| 1592_01590 | hypothetical protein                                          | WP_010780753.1 | 3.2337 |
| 1592_00148 | hypothetical protein                                          | WP_010782142.1 | 3.2158 |
| 1592_00172 | cation diffusion facilitator family transporter               | WP_010782118.1 | 3.2108 |
| 1592_03697 | hypothetical protein                                          | WP_010779113.1 | 3.1788 |
| 1592_00218 | hypothetical protein                                          | WP_010782073.1 | 3.1672 |
| 1592_01428 | hypothetical protein                                          | WP_010780912.1 | 3.1654 |
| 1592_02942 | hypothetical protein                                          | WP_010779476.1 | 3.1463 |
| 1592_00206 | hypothetical protein                                          | WP_010782084.1 | 3.1292 |
| 1592_03603 | hypothetical protein                                          | WP_010779207.1 | 3.0792 |
| 1592_00509 | hypothetical protein                                          | WP_010781797.1 | 3.0628 |
| 1592_01591 | ATP-dependent protease ATP-binding subunit ClpX               | WP_010780752.1 | 3.0527 |
| 1592_01183 | amidase                                                       | WP_010781154.1 | 3.0498 |

|            |                                                            |                |        |
|------------|------------------------------------------------------------|----------------|--------|
| 1592_01873 | hypothetical protein                                       | WP_010780489.1 | 3.0415 |
| 1592_00378 | serine protease do-like htrA                               | WP_010781928.1 | 3.0354 |
| 1592_02077 | ATP-dependent Clp protease ATP-binding subunit ClpE        | WP_010780295.1 | 3.0256 |
| 1592_02936 | hypothetical protein                                       | WP_010779482.1 | 2.9978 |
| 1592_01793 | hypothetical protein                                       | WP_010780568.1 | 2.9709 |
| 1592_01681 | zinc-binding alcohol dehydrogenase                         | WP_010780662.1 | 2.9604 |
| 1592_02792 | chaperonin                                                 | WP_010779626.1 | 2.9547 |
| 1592_03665 | ketose-bisphosphate aldolase                               | WP_010779145.1 | 2.9428 |
| 1592_03464 | hypothetical protein                                       | WP_010779346.1 | 2.9404 |
| 1592_01595 | hypothetical protein                                       | WP_010780748.1 | 2.9396 |
| 1592_00404 | hypothetical protein                                       | WP_010781902.1 | 2.9150 |
| 1592_02234 | azoreductase                                               | WP_010780142.1 | 2.8964 |
| 1592_02182 | hypothetical protein                                       | WP_010780193.1 | 2.8920 |
| 1592_02839 | hypothetical protein                                       | WP_010779579.1 | 2.8661 |
| 1592_01986 | hypothetical protein                                       | WP_010780382.1 | 2.8616 |
| 1592_00864 | peptidase M13                                              | WP_010781458.1 | 2.8560 |
| 1592_01690 | formamidopyrimidine-DNA glycosylase                        | WP_010780653.1 | 2.8428 |
| 1592_01827 | tagatose 1%2C6-diphosphate aldolase                        | WP_010780535.1 | 2.8374 |
| 1592_01846 | PTS system ascorbate-specific transporter subunit IIB      | WP_010780516.1 | 2.8337 |
| 1592_03522 | hypothetical protein                                       | WP_010779288.1 | 2.8114 |
| 1592_00478 | hypothetical protein                                       | WP_010781828.1 | 2.8046 |
| 1592_02367 | ABC transporter ATP-binding protein                        | WP_010780015.1 | 2.7659 |
| 1592_02654 | ABC transporter ATP-binding protein/permease               | WP_010779732.1 | 2.7522 |
| 1592_02531 | hypothetical protein                                       | WP_010779855.1 | 2.7275 |
| 1592_00343 | calcium-translocating P-type ATPase%2C PMCA-type           | WP_010781963.1 | 2.7221 |
| 1592_01657 | hypothetical protein                                       | WP_010780686.1 | 2.7080 |
| 1592_03125 | hypothetical protein                                       | WP_010778774.1 | 2.7071 |
| 1592_03745 | hypothetical protein                                       | WP_010779065.1 | 2.7034 |
| 1592_01689 | dephospho-CoA kinase                                       | WP_010780654.1 | 2.7026 |
| 1592_03348 | signal peptidase I                                         | WP_010778550.1 | 2.6971 |
| 1592_02982 | PTS system%2C Fru family%2C IIB component                  | WP_010779436.1 | 2.6892 |
| 1592_01700 | sodium/dicarboxylate symporter family protein              | WP_010780643.1 | 2.6882 |
| 1592_02132 | aminopeptidase PepS                                        | WP_010780241.1 | 2.6829 |
| 1592_00668 | hypothetical protein                                       | WP_010781646.1 | 2.6805 |
| 1592_00574 | hypothetical protein                                       | WP_010781732.1 | 2.6798 |
| 1592_00416 | enolase 1                                                  | WP_010781890.1 | 2.6778 |
| 1592_00545 | hypothetical protein                                       | WP_010781761.1 | 2.6637 |
| 1592_00744 | hypothetical protein                                       | WP_010781574.1 | 2.6533 |
| 1592_03810 | hypothetical protein                                       | WP_010779000.1 | 2.6317 |
| 1592_00685 | PTS system mannose/fructose/sorbose-specific IIC component | WP_010781629.1 | 2.6271 |
| 1592_03811 | hypothetical protein                                       | WP_010778999.1 | 2.6178 |
| 1592_03515 | YegS//BmrU family lipid kinase                             | WP_010779295.1 | 2.5993 |
| 1592_00669 | glyoxalase                                                 | WP_010781645.1 | 2.5958 |
| 1592_01718 | hypothetical protein                                       | WP_010780625.1 | 2.5952 |
| 1592_02655 | ABC transporter ATP-binding protein/permease               | WP_010779731.1 | 2.5946 |
| 1592_01544 | hypothetical protein                                       | WP_010780799.1 | 2.5907 |
| 1592_02611 | dihydroorotase                                             | WP_010779775.1 | 2.5902 |
| 1592_02369 | oligopeptide ABC transporter%2C permease OppC              | WP_010780013.1 | 2.5871 |
| 1592_02481 | metallo-beta-lactamase                                     | WP_010779903.1 | 2.5801 |
| 1592_03502 | hypothetical protein                                       | WP_010779308.1 | 2.5661 |
| 1592_02020 | hypothetical protein                                       | WP_010780348.1 | 2.5616 |
| 1592_00948 | hypothetical protein                                       | WP_010781374.1 | 2.5579 |
| 1592_01648 | hypothetical protein                                       | WP_010780695.1 | 2.5482 |
| 1592_03471 | M3 family oligoendopeptidase                               | WP_010779339.1 | 2.4967 |
| 1592_02791 | tRNA-dihydrouridine synthase                               | WP_010779627.1 | 2.4939 |
| 1592_02840 | cobalamin biosynthesis protein CbiM                        | WP_010779578.1 | 2.4939 |
| 1592_01211 | hypothetical protein                                       | WP_010781126.1 | 2.4919 |
| 1592_02613 | permease                                                   | WP_010779773.1 | 2.4854 |
| 1592_01874 | hypothetical protein                                       | WP_010780488.1 | 2.4841 |
| 1592_03117 | hypothetical protein                                       | WP_010778782.1 | 2.4799 |
| 1592_01437 | hypothetical protein                                       | WP_010780903.1 | 2.4785 |
| 1592_01074 | redox-sensing transcriptional repressor rex 1              | WP_010781253.1 | 2.4782 |
| 1592_02983 | hypothetical protein                                       | WP_010779435.1 | 2.4658 |
| 1592_00192 | protein recA                                               | WP_010782098.1 | 2.4601 |
| 1592_00095 | L-ribulose-5-phosphate 4-epimerase                         | WP_010782195.1 | 2.4550 |
| 1592_04127 | DNA topoisomerase III                                      | WP_010782362.1 | 2.4481 |
| 1592_03337 | hypothetical protein                                       | WP_010778561.1 | 2.4468 |
| 1592_01015 | hypothetical protein                                       | WP_010781312.1 | 2.4444 |
| 1592_00720 | hypothetical protein                                       | WP_010781596.1 | 2.4435 |
| 1592_01493 | transcriptional regulator                                  | WP_010780848.1 | 2.4422 |
| 1592_00721 | ribonuclease R                                             | WP_010781595.1 | 2.4373 |
| 1592_00981 | hypothetical protein                                       | WP_010781343.1 | 2.4330 |
| 1592_03012 | hypothetical protein                                       | WP_010779406.1 | 2.4279 |
| 1592_01545 | hypothetical protein                                       | WP_010780798.1 | 2.4245 |
| 1592_00306 | L-ribulose-5-phosphate 4-epimerase                         | WP_010781996.1 | 2.4212 |
| 1592_02716 | hypothetical protein                                       | WP_010779670.1 | 2.4106 |
| 1592_00947 | hypothetical protein                                       | WP_010781375.1 | 2.3947 |
| 1592_03579 | DNA-binding response regulator                             | WP_010779231.1 | 2.3833 |
| 1592_00847 | hypothetical protein                                       | WP_010781475.1 | 2.3808 |
| 1592_00064 | hypothetical protein                                       | WP_010782226.1 | 2.3786 |
| 1592_00992 | PTS system%2C glucose subfamily%2C IIA component           | WP_010781332.1 | 2.3758 |
| 1592_01410 | CoA-binding protein                                        | WP_010780929.1 | 2.3706 |
| 1592_00691 | hypothetical protein                                       | WP_010781625.1 | 2.3601 |
| 1592_01513 | 30S ribosomal protein S14 1                                | WP_010780828.1 | 2.3513 |
| 1592_00962 | YegS//BmrU family lipid kinase                             | WP_010781361.1 | 2.3485 |
| 1592_01554 | cold shock protein                                         | WP_010780789.1 | 2.3462 |

|            |                                                               |                |        |
|------------|---------------------------------------------------------------|----------------|--------|
| 1592_01418 | hypothetical protein                                          | WP_010780921.1 | 2.3336 |
| 1592_02948 | hypothetical protein                                          | WP_010779470.1 | 2.3331 |
| 1592_01496 | hypothetical protein                                          | WP_010780845.1 | 2.3312 |
| 1592_00327 | hypothetical protein                                          | WP_010781975.1 | 2.3182 |
| 1592_00722 | SsrA-binding protein                                          | WP_010781594.1 | 2.3099 |
| 1592_01189 | thioredoxin                                                   | WP_010781148.1 | 2.3089 |
| 1592_02217 | hypothetical protein                                          | WP_010780159.1 | 2.3041 |
| 1592_02226 | hypothetical protein                                          | WP_010780150.1 | 2.3013 |
| 1592_01210 | HD protein                                                    | WP_010781127.1 | 2.2952 |
| 1592_00199 | ABC transporter permease                                      | WP_010782091.1 | 2.2945 |
| 1592_00854 | membrane protein                                              | WP_010781468.1 | 2.2927 |
| 1592_03330 | hypothetical protein                                          | WP_010778568.1 | 2.2855 |
| 1592_03279 | hypothetical protein                                          | WP_010778619.1 | 2.2835 |
| 1592_02878 | glutamate-tRNA ligase                                         | WP_010779540.1 | 2.2833 |
| 1592_00281 | hypothetical protein                                          | WP_010782021.1 | 2.2811 |
| 1592_03007 | MazG nucleotide pyrophosphohydrolase                          | WP_010779411.1 | 2.2762 |
| 1592_02224 | hypothetical protein                                          | WP_010780152.1 | 2.2757 |
| 1592_03563 | hypothetical protein                                          | WP_010779247.1 | 2.2705 |
| 1592_02372 | oligopeptide ABC transporter%2C binding protein               | WP_010780010.1 | 2.2671 |
| 1592_03036 | DNA protection during starvation protein 1                    | WP_010779381.1 | 2.2625 |
| 1592_01835 | hypothetical protein                                          | WP_010780527.1 | 2.2604 |
| 1592_02609 | hypothetical protein                                          | WP_010779777.1 | 2.2539 |
| 1592_03114 | hypothetical protein                                          | WP_010778785.1 | 2.2536 |
| 1592_02976 | hypothetical protein                                          | WP_010779442.1 | 2.2487 |
| 1592_03569 | hypothetical protein                                          | WP_010779241.1 | 2.2484 |
| 1592_02977 | hypothetical protein                                          | WP_010779441.1 | 2.2452 |
| 1592_01820 | hypothetical protein                                          | WP_010780542.1 | 2.2307 |
| 1592_02141 | glucose-6-phosphate dehydrogenase                             | WP_010780233.1 | 2.2221 |
| 1592_00657 | phosphatidylglycerophosphatase A                              | WP_010781653.1 | 2.2215 |
| 1592_02843 | TIGR00268 family protein                                      | WP_010779575.1 | 2.2186 |
| 1592_01573 | hypothetical protein                                          | WP_010780770.1 | 2.1946 |
| 1592_01429 | N-acetylglucosamine-6-phosphate deacetylase                   | WP_010780911.1 | 2.1857 |
| 1592_02501 | DNA polymerase IV                                             | WP_010779883.1 | 2.1809 |
| 1592_02573 | glutamyl aminopeptidase                                       | WP_010779813.1 | 2.1800 |
| 1592_02865 | MGT family glycosyltransferase                                | WP_010779553.1 | 2.1799 |
| 1592_03099 | hypothetical protein                                          | WP_010778800.1 | 2.1760 |
| 1592_03182 | hypothetical protein                                          | WP_010778717.1 | 2.1681 |
| 1592_01546 | hypothetical protein                                          | WP_010780797.1 | 2.1676 |
| 1592_01563 | pyrR protein                                                  | WP_010780780.1 | 2.1596 |
| 1592_00518 | hypothetical protein                                          | WP_010781788.1 | 2.1585 |
| 1592_03454 | hypothetical protein                                          | WP_010779356.1 | 2.1556 |
| 1592_03800 | cyclic lactone autoinducer peptide                            | WP_010779010.1 | 2.1478 |
| 1592_01990 | hypothetical protein                                          | WP_010780378.1 | 2.1434 |
| 1592_01972 | flavin reductase                                              | WP_010780396.1 | 2.1426 |
| 1592_03122 | hypothetical protein                                          | WP_010778777.1 | 2.1399 |
| 1592_01093 | hypothetical protein                                          | WP_010781235.1 | 2.1324 |
| 1592_01666 | phosphoribosylformylglycinamide synthase%2C purS protein      | WP_010780677.1 | 2.1319 |
| 1592_02368 | oligopeptide/dipeptide ABC transporter%2C ATP-binding protein | WP_010780014.1 | 2.1288 |
| 1592_00134 | hypothetical protein                                          | WP_010782156.1 | 2.1282 |
| 1592_01075 | hypothetical protein                                          | WP_010781252.1 | 2.1258 |
| 1592_00500 | hypothetical protein                                          | WP_010781806.1 | 2.1245 |
| 1592_01180 | hypothetical protein                                          | WP_010781157.1 | 2.1226 |
| 1592_02616 | PRD domain-containing protein                                 | WP_010779770.1 | 2.1220 |
| 1592_02482 | hypothetical protein                                          | WP_010779902.1 | 2.1217 |
| 1592_00697 | hypothetical protein                                          | WP_010781619.1 | 2.1194 |
| 1592_00471 | PTS system%2C glucitol/sorbitol-specific IIA component        | WP_010781835.1 | 2.1188 |
| 1592_02991 | hypothetical protein                                          | WP_010779427.1 | 2.1139 |
| 1592_02975 | hypothetical protein                                          | WP_010779443.1 | 2.1132 |
| 1592_03473 | hypothetical protein                                          | WP_010779337.1 | 2.1087 |
| 1592_00219 | ribosomal protein L25%2C Ctc-form                             | WP_010782072.1 | 2.1044 |
| 1592_03580 | sensor histidine kinase KdpD                                  | WP_010779230.1 | 2.1027 |
| 1592_02955 | PTS system%2C lactose/cellobiose family IIC component         | WP_010779463.1 | 2.0994 |
| 1592_01212 | hypothetical protein                                          | WP_010781125.1 | 2.0953 |
| 1592_03346 | hypothetical protein                                          | WP_010778552.1 | 2.0949 |
| 1592_02219 | serine hydroxymethyltransferase                               | WP_010780157.1 | 2.0940 |
| 1592_03843 | hypothetical protein                                          | WP_010778967.1 | 2.0917 |
| 1592_00778 | hypothetical protein                                          | WP_010781540.1 | 2.0916 |
| 1592_00880 | DNA topoisomerase III                                         | WP_010781442.1 | 2.0914 |
| 1592_03013 | tRNA-dihydrouridine synthase                                  | WP_010779405.1 | 2.0913 |
| 1592_01565 | aspartate carbamoyltransferase                                | WP_010780778.1 | 2.0889 |
| 1592_01525 | hypothetical protein                                          | WP_010780818.1 | 2.0823 |
| 1592_01564 | uracil-xanthine permease                                      | WP_010780779.1 | 2.0776 |
| 1592_03612 | hypothetical protein                                          | WP_010779198.1 | 2.0738 |
| 1592_00879 | hypothetical protein                                          | WP_010781443.1 | 2.0710 |
| 1592_01698 | serine/threonine protein phosphatase 1                        | WP_010780645.1 | 2.0698 |
| 1592_00982 | hypothetical protein                                          | WP_010781342.1 | 2.0590 |
| 1592_02567 | ATP-dependent Clp endopeptidase%2C proteolytic subunit ClpP   | WP_010779819.1 | 2.0567 |
| 1592_00682 | hypothetical protein                                          | WP_010781632.1 | 2.0552 |
| 1592_01478 | mannosyl-glycoprotein endo-beta-N-acetylglucosaminidase       | WP_010780862.1 | 2.0490 |
| 1592_02621 | phospholipase/carboxylesterase                                | WP_010779765.1 | 2.0484 |
| 1592_02095 | trk system potassium uptake protein TrkA                      | WP_010780278.1 | 2.0470 |
| 1592_01263 | hypothetical protein                                          | WP_010781075.1 | 2.0432 |
| 1592_01653 | magnesium-translocating P-type ATPase                         | WP_010780690.1 | 2.0415 |
| 1592_02045 | hypothetical protein                                          | WP_010780324.1 | 2.0396 |
| 1592_03031 | PTS system%2C Fru family%2C IIC component                     | WP_010779386.1 | 2.0371 |
| 1592_01865 | hypothetical protein                                          | WP_010780497.1 | 2.0370 |

|            |                                                  |                |        |
|------------|--------------------------------------------------|----------------|--------|
| 1592_01752 | threonine dehydratase                            | WP_010780591.1 | 2.0295 |
| 1592_03833 | hypothetical protein                             | WP_010778977.1 | 2.0292 |
| 1592_00098 | hypothetical protein                             | WP_010782192.1 | 2.0278 |
| 1592_00526 | hypothetical protein                             | WP_010781780.1 | 2.0276 |
| 1592_00007 | hypothetical protein                             | WP_010782280.1 | 2.0260 |
| 1592_03590 | hypothetical protein                             | WP_010779220.1 | 2.0249 |
| 1592_01903 | hypothetical protein                             | WP_010780459.1 | 2.0220 |
| 1592_00058 | hypothetical protein                             | WP_010782232.1 | 2.0184 |
| 1592_02842 | hypothetical protein                             | WP_010779576.1 | 2.0075 |
| 1592_00777 | hypothetical protein                             | WP_010781541.1 | 2.0066 |
| 1592_00017 | 3-dehydroquinate dehydratase%2C type I           | WP_010782270.1 | 2.0044 |
| 1592_00675 | hypothetical protein                             | WP_010781639.1 | 2.0033 |
| 1592_02370 | oligopeptide ABC transporter%2C membrane protein | WP_010780012.1 | 2.0006 |
| 1592_02192 | hypothetical protein                             | WP_010780183.1 | 2.0004 |

#### Decreased (<0.5)

|            |                                                                      |                |        |
|------------|----------------------------------------------------------------------|----------------|--------|
| 1592_03360 | FMN-binding protein                                                  | WP_010778538.1 | 0.0273 |
| 1592_01460 | hypothetical protein                                                 | WP_010780880.1 | 0.0283 |
| 1592_01462 | hypothetical protein                                                 | WP_010780878.1 | 0.0336 |
| 1592_01463 | hypothetical protein                                                 | WP_010780877.1 | 0.0350 |
| 1592_01459 | hypothetical protein                                                 | WP_010780881.1 | 0.0373 |
| 1592_00326 | aldehyde-alcohol dehydrogenase                                       | WP_010781976.1 | 0.0508 |
| 1592_01461 | hypothetical protein                                                 | WP_010780879.1 | 0.0508 |
| 1592_01465 | hypothetical protein                                                 | WP_010780875.1 | 0.0552 |
| 1592_01464 | hypothetical protein                                                 | WP_010780876.1 | 0.0631 |
| 1592_01468 | hypothetical protein                                                 | WP_010780872.1 | 0.0660 |
| 1592_01466 | hypothetical protein                                                 | WP_010780874.1 | 0.0760 |
| 1592_01467 | transferase 2%2C rSAM/selenodomain-associated                        | WP_010780873.1 | 0.0781 |
| 1592_01676 | alanine dehydrogenase                                                | WP_010780667.1 | 0.0826 |
| 1592_03946 | hypothetical protein                                                 | WP_010778865.1 | 0.0865 |
| 1592_03947 | hypothetical protein                                                 | WP_010778864.1 | 0.0879 |
| 1592_03252 | hypothetical protein                                                 | WP_010778646.1 | 0.0916 |
| 1592_03251 | iron ABC transporter ATP-binding protein                             | WP_010778647.1 | 0.0922 |
| 1592_01469 | transferase 1%2C rSAM/selenodomain-associated                        | WP_010780871.1 | 0.0928 |
| 1592_01675 | threonine ammonia-lyase                                              | WP_010780668.1 | 0.0962 |
| 1592_03359 | pyridine nucleotide-disulfide oxidoreductase                         | WP_010778539.1 | 0.1029 |
| 1592_03914 | hypothetical protein                                                 | WP_010778896.1 | 0.1039 |
| 1592_03945 | hypothetical protein                                                 | WP_010778866.1 | 0.1061 |
| 1592_02381 | hypothetical protein                                                 | WP_010780001.1 | 0.1068 |
| 1592_01471 | hypothetical protein                                                 | WP_010780869.1 | 0.1141 |
| 1592_03253 | iron ABC transporter system permease                                 | WP_010778645.1 | 0.1143 |
| 1592_01470 | hypothetical protein                                                 | WP_010780870.1 | 0.1177 |
| 1592_03943 | selenium metabolism protein YedF                                     | WP_010778868.1 | 0.1383 |
| 1592_00704 | redox-sensing transcriptional repressor Rex                          | WP_010781612.1 | 0.1401 |
| 1592_03953 | hypothetical protein                                                 | WP_010778859.1 | 0.1424 |
| 1592_03938 | hypothetical protein                                                 | WP_010778873.1 | 0.1434 |
| 1592_03944 | selenide%2C water dikinase                                           | WP_010778867.1 | 0.1463 |
| 1592_02608 | hypothetical protein                                                 | WP_010779778.1 | 0.1492 |
| 1592_03952 | hypothetical protein                                                 | WP_010778860.1 | 0.1504 |
| 1592_02380 | ferrous iron transporter B                                           | WP_010780002.1 | 0.1549 |
| 1592_03951 | hypothetical protein                                                 | WP_010741587.1 | 0.1587 |
| 1592_00349 | amino acid permease                                                  | WP_010781957.1 | 0.1604 |
| 1592_03942 | hypothetical protein                                                 | WP_010778869.1 | 0.1629 |
| 1592_03361 | thiamine biosynthesis lipoprotein                                    | WP_010778537.1 | 0.1630 |
| 1592_00523 | hypothetical protein                                                 | WP_010781783.1 | 0.1645 |
| 1592_03939 | L-seryl-tRNA selenium transferase                                    | WP_010778872.1 | 0.1669 |
| 1592_03948 | hypothetical protein                                                 | WP_010778863.1 | 0.1677 |
| 1592_03950 | glycine/betaine/sarcosine/D-proline reductase family selenoprotein B | WP_010778861.1 | 0.1707 |
| 1592_03250 | iron ABC transporter substrate-binding protein                       | WP_010778648.1 | 0.1708 |
| 1592_03940 | cysteine desulfurase                                                 | WP_010778871.1 | 0.1721 |
| 1592_03362 | hypothetical protein                                                 | WP_010778536.1 | 0.1725 |
| 1592_03949 | D-proline reductase subunit gamma                                    | WP_010778862.1 | 0.1727 |
| 1592_02499 | anaerobic ribonucleoside-triphosphate reductase                      | WP_010779885.1 | 0.1738 |
| 1592_00145 | hypothetical protein                                                 | WP_010782145.1 | 0.1786 |
| 1592_02500 | anaerobic ribonucleoside-triphosphate reductase activating protein   | WP_010779884.1 | 0.1792 |
| 1592_03941 | selenocysteine-specific translation elongation factor                | WP_010778870.1 | 0.1843 |
| 1592_03500 | hypothetical protein                                                 | WP_010779310.1 | 0.1865 |
| 1592_00859 | hypothetical protein                                                 | WP_010781463.1 | 0.1897 |
| 1592_00834 | hypothetical protein                                                 | WP_010781488.1 | 0.1908 |
| 1592_00529 | hypothetical protein                                                 | WP_010781777.1 | 0.1975 |
| 1592_03937 | hypothetical protein                                                 | WP_010778874.1 | 0.2004 |
| 1592_03363 | hypothetical protein                                                 | WP_010778535.1 | 0.2004 |
| 1592_01158 | glutamine synthetase                                                 | WP_010781177.1 | 0.2035 |
| 1592_03285 | hypothetical protein                                                 | WP_010778613.1 | 0.2117 |
| 1592_03596 | hypothetical protein                                                 | WP_010779214.1 | 0.2127 |
| 1592_00898 | hypothetical protein                                                 | WP_010781424.1 | 0.2238 |
| 1592_00528 | YaeC family lipoprotein                                              | WP_010781778.1 | 0.2243 |
| 1592_00857 | hypothetical protein                                                 | WP_010781465.1 | 0.2336 |
| 1592_03501 | formate/nitrite transporter                                          | WP_010779309.1 | 0.2347 |
| 1592_04051 | ABC transporter ATP-binding protein                                  | WP_016250208.1 | 0.2398 |
| 1592_00440 | LPXTG-domain-containing protein cell wall anchor domain              | WP_010781866.1 | 0.2434 |
| 1592_00836 | ABC transporter ATP-binding protein                                  | WP_010781486.1 | 0.2534 |
| 1592_00015 | hypothetical protein                                                 | WP_010782272.1 | 0.2569 |
| 1592_00835 | hypothetical protein                                                 | WP_010781487.1 | 0.2607 |
| 1592_00531 | hypothetical protein                                                 | WP_010781775.1 | 0.2623 |

|            |                                                                               |                |        |
|------------|-------------------------------------------------------------------------------|----------------|--------|
| 1592_00895 | PTS system%2C fructose subfamily%2C IIA component                             | WP_010781427.1 | 0.2640 |
| 1592_02956 | hypothetical protein                                                          | WP_010779462.1 | 0.2654 |
| 1592_00169 | hypothetical protein                                                          | WP_010782121.1 | 0.2674 |
| 1592_02618 | hypothetical protein                                                          | WP_010779768.1 | 0.2680 |
| 1592_03634 | hypothetical protein                                                          | WP_010779176.1 | 0.2688 |
| 1592_00530 | hypothetical protein                                                          | WP_010781776.1 | 0.2694 |
| 1592_04076 | hypothetical protein                                                          | WP_010782376.1 | 0.2770 |
| 1592_02517 | ammonium transporter                                                          | WP_010779869.1 | 0.2776 |
| 1592_03220 | hypothetical protein                                                          | WP_010778678.1 | 0.2789 |
| 1592_01729 | glutamine-fructose-6-phosphate transaminase (isomerizing)                     | WP_010780614.1 | 0.2797 |
| 1592_02379 | hypothetical protein                                                          | WP_010780003.1 | 0.2801 |
| 1592_03714 | hypothetical protein                                                          | WP_010779096.1 | 0.2818 |
| 1592_00837 | hypothetical protein                                                          | WP_010781485.1 | 0.2853 |
| 1592_03954 | hypothetical protein                                                          | WP_010778858.1 | 0.2873 |
| 1592_03915 | hypothetical protein                                                          | WP_010778895.1 | 0.2887 |
| 1592_03955 | proline-specific peptidase                                                    | WP_010778857.1 | 0.2927 |
| 1592_01157 | MerR family transcriptional regulator                                         | WP_010744471.1 | 0.3002 |
| 1592_03715 | TIGR00730 family protein                                                      | WP_010779095.1 | 0.3011 |
| 1592_03004 | hydroxyethylthiazole kinase                                                   | WP_010779414.1 | 0.3154 |
| 1592_01762 | tRNA-Leu                                                                      | .              | 0.3177 |
| 1592_03859 | PFL2/glycerol dehydratase family glycol radical enzyme                        | WP_010778951.1 | 0.3178 |
| 1592_00511 | hypothetical protein                                                          | WP_010781795.1 | 0.3260 |
| 1592_02139 | hypothetical protein                                                          | WP_010780235.1 | 0.3272 |
| 1592_03008 | hypothetical protein                                                          | WP_010779410.1 | 0.3278 |
| 1592_02138 | glutamate synthase%2C NADH/NADPH%2C small subunit                             | WP_010780236.1 | 0.3285 |
| 1592_02603 | hypothetical protein                                                          | WP_010779783.1 | 0.3345 |
| 1592_00146 | hypothetical protein                                                          | WP_010782144.1 | 0.3350 |
| 1592_02965 | methionine gamma-lyase                                                        | WP_010779453.1 | 0.3374 |
| 1592_01629 | ferredoxin-NADP(+) reductase subunit alpha                                    | WP_010780714.1 | 0.3375 |
| 1592_03632 | PTS system galactitol-specific transporter subunit IIC                        | WP_010779178.1 | 0.3385 |
| 1592_02931 | S-ribosylhomocysteine lyase                                                   | WP_010779487.1 | 0.3420 |
| 1592_01628 | glutamate synthase (NADPH)%2C homotetrameric                                  | WP_010780715.1 | 0.3423 |
| 1592_03276 | hypothetical protein                                                          | WP_010778622.1 | 0.3435 |
| 1592_01630 | flavodoxin                                                                    | WP_010780713.1 | 0.3455 |
| 1592_02933 | cysteine synthase A                                                           | WP_010779485.1 | 0.3463 |
| 1592_03024 | hypothetical protein                                                          | WP_016250201.1 | 0.3500 |
| 1592_01901 | hypothetical protein                                                          | WP_010780461.1 | 0.3513 |
| 1592_02932 | hypothetical protein                                                          | WP_010779486.1 | 0.3535 |
| 1592_00178 | serine O-acetyltransferase                                                    | WP_010782112.1 | 0.3562 |
| 1592_00277 | hypothetical protein                                                          | WP_010782025.1 | 0.3567 |
| 1592_03565 | nicotinamide mononucleotide transporter PnuC                                  | WP_010779245.1 | 0.3627 |
| 1592_03221 | hypothetical protein                                                          | WP_010778677.1 | 0.3665 |
| 1592_01744 | His/Glu/Gln/Arg/opine family amino ABC transporter%2C permease%2C 3-TM region | WP_010780599.1 | 0.3670 |
| 1592_03019 | TIGR00268 family protein                                                      | WP_010779399.1 | 0.3679 |
| 1592_00858 | shikimate 5-dehydrogenase                                                     | WP_010781464.1 | 0.3686 |
| 1592_03716 | hypothetical protein                                                          | WP_010779094.1 | 0.3693 |
| 1592_03003 | thiamine-phosphate pyrophosphorylase                                          | WP_010779415.1 | 0.3715 |
| 1592_01745 | amino acid ABC transporter ATP-binding protein                                | WP_010780598.1 | 0.3763 |
| 1592_03898 | glycine betaine/L-proline transport ATP binding subunit                       | WP_010778912.1 | 0.3769 |
| 1592_00180 | ribonuclease III                                                              | WP_010782110.1 | 0.3770 |
| 1592_03022 | hypothetical protein                                                          | WP_016250199.1 | 0.3776 |
| 1592_03700 | hypothetical protein                                                          | WP_010779110.1 | 0.3806 |
| 1592_00557 | hypothetical protein                                                          | WP_010781749.1 | 0.3808 |
| 1592_00776 | hypothetical protein                                                          | WP_010781542.1 | 0.3810 |
| 1592_03499 | hypothetical protein                                                          | WP_010779311.1 | 0.3827 |
| 1592_00884 | PTS system%2C lactose/cellobiose family IIB component                         | WP_010781438.1 | 0.3860 |
| 1592_03699 | membrane protein                                                              | WP_010779111.1 | 0.3940 |
| 1592_03524 | hypothetical protein                                                          | WP_010779286.1 | 0.3963 |
| 1592_02602 | hypothetical protein                                                          | WP_010779784.1 | 0.3964 |
| 1592_03264 | hypothetical protein                                                          | WP_010778634.1 | 0.3980 |
| 1592_01071 | D-xylulose 5-phosphate/D-fructose 6-phosphate phosphoketolase                 | WP_010781256.1 | 0.3991 |
| 1592_03566 | deoxynucleoside kinase                                                        | WP_010779244.1 | 0.4000 |
| 1592_00181 | RNA methyltransferase%2C TrmH family%2C group 3                               | WP_010782109.1 | 0.4006 |
| 1592_03741 | hypothetical protein                                                          | WP_010779069.1 | 0.4012 |
| 1592_02516 | hypothetical protein                                                          | WP_010779870.1 | 0.4038 |
| 1592_03956 | hypothetical protein                                                          | WP_010778856.1 | 0.4044 |
| 1592_02698 | PTS system%2C beta-glucoside-specific IIBC component                          | WP_010779688.1 | 0.4053 |
| 1592_00412 | hypothetical protein                                                          | WP_010781894.1 | 0.4065 |
| 1592_03023 | ABC transporter ATP-binding protein                                           | WP_016250200.1 | 0.4066 |
| 1592_00179 | cysteinyI-tRNA synthetase                                                     | WP_010782111.1 | 0.4071 |
| 1592_04037 | hypothetical protein                                                          | WP_010782314.1 | 0.4104 |
| 1592_04063 | hypothetical protein                                                          | WP_010782321.1 | 0.4140 |
| 1592_01627 | pyruvate:ferredoxin (flavodoxin) oxidoreductase                               | WP_010780716.1 | 0.4150 |
| 1592_01413 | formate acetyltransferase                                                     | WP_010780926.1 | 0.4164 |
| 1592_00118 | ribose uptake protein                                                         | WP_010782172.1 | 0.4180 |
| 1592_04074 | hypothetical protein                                                          | WP_010782378.1 | 0.4191 |
| 1592_03967 | hypothetical protein                                                          | WP_010778845.1 | 0.4210 |
| 1592_03897 | glycine betaine/carnitine/choline ABC transporter permease                    | WP_010778913.1 | 0.4212 |
| 1592_01517 | enoyl-ACP reductase                                                           | WP_010780824.1 | 0.4220 |
| 1592_03080 | PTS system%2C beta-glucoside-specific IIBC component                          | WP_010778819.1 | 0.4223 |
| 1592_00092 | hypothetical protein                                                          | WP_010782198.1 | 0.4250 |
| 1592_02859 | hypothetical protein                                                          | WP_010779559.1 | 0.4253 |
| 1592_03463 | hypothetical protein                                                          | WP_010779347.1 | 0.4270 |
| 1592_00314 | hypothetical protein                                                          | WP_010781988.1 | 0.4281 |
| 1592_02903 | short chain dehydrogenase/reductase family oxidoreductase                     | WP_010779515.1 | 0.4283 |
| 1592_03836 | hypothetical protein                                                          | WP_010778974.1 | 0.4302 |

|            |                                                                  |                |        |
|------------|------------------------------------------------------------------|----------------|--------|
| 1592_03449 | aspartate aminotransferase                                       | WP_010779361.1 | 0.4308 |
| 1592_03891 | hypothetical protein                                             | WP_010778919.1 | 0.4327 |
| 1592_01625 | heavy metal translocating P-type ATPase                          | WP_010780718.1 | 0.4337 |
| 1592_03172 | hypothetical protein                                             | WP_010778727.1 | 0.4351 |
| 1592_00901 | 23S rRNA methyltransferase                                       | WP_010781421.1 | 0.4361 |
| 1592_01518 | beta-hydroxyacyl-(acyl-carrier-protein) dehydratase FabZ         | WP_010780823.1 | 0.4402 |
| 1592_02968 | hypothetical protein                                             | WP_010779450.1 | 0.4406 |
| 1592_00182 | hypothetical protein                                             | WP_010782108.1 | 0.4415 |
| 1592_03652 | hypothetical protein                                             | WP_010779158.1 | 0.4428 |
| 1592_03530 | hypothetical protein                                             | WP_010779280.1 | 0.4433 |
| 1592_02593 | hypothetical protein                                             | WP_010779793.1 | 0.4434 |
| 1592_03335 | hypothetical protein                                             | WP_010778563.1 | 0.4437 |
| 1592_03076 | hypothetical protein                                             | WP_010778823.1 | 0.4438 |
| 1592_03093 | hypothetical protein                                             | WP_010778806.1 | 0.4486 |
| 1592_00820 | hypothetical protein                                             | WP_010781501.1 | 0.4514 |
| 1592_03671 | hypothetical protein                                             | WP_010779139.1 | 0.4532 |
| 1592_04078 | glycosyltransferase                                              | WP_001083514.1 | 0.4548 |
| 1592_01138 | hypothetical protein                                             | WP_016250187.1 | 0.4556 |
| 1592_00849 | hypothetical protein                                             | WP_010781473.1 | 0.4558 |
| 1592_03740 | hypothetical protein                                             | WP_010779070.1 | 0.4565 |
| 1592_00147 | hypothetical protein                                             | WP_010782143.1 | 0.4570 |
| 1592_01473 | hypothetical protein                                             | WP_010780867.1 | 0.4584 |
| 1592_00059 | hypothetical protein                                             | WP_010782231.1 | 0.4597 |
| 1592_00077 | hypothetical protein                                             | WP_010782213.1 | 0.4601 |
| 1592_02194 | hypothetical protein                                             | WP_010780181.1 | 0.4603 |
| 1592_03677 | hypothetical protein                                             | WP_010779133.1 | 0.4608 |
| 1592_03446 | hypothetical protein                                             | WP_010779364.1 | 0.4609 |
| 1592_00738 | hypothetical protein                                             | WP_010781578.1 | 0.4627 |
| 1592_02060 | acetyl-coenzyme A carboxylase carboxyl transferase subunit beta  | WP_010780309.1 | 0.4641 |
| 1592_00116 | ribokinase                                                       | WP_010782174.1 | 0.4643 |
| 1592_02891 | basic membrane lipoprotein                                       | WP_010779527.1 | 0.4669 |
| 1592_03265 | hypothetical protein                                             | WP_010778633.1 | 0.4671 |
| 1592_01667 | phosphoribosylaminoimidazolesuccinocarboxamide synthase          | WP_010780676.1 | 0.4675 |
| 1592_02059 | acetyl-coenzyme A carboxylase carboxyl transferase subunit alpha | WP_010780310.1 | 0.4686 |
| 1592_02560 | fructose-6-phosphate aldolase                                    | WP_010779826.1 | 0.4701 |
| 1592_04036 | hypothetical protein                                             | WP_010782315.1 | 0.4719 |
| 1592_01575 | hypothetical protein                                             | WP_010780768.1 | 0.4721 |
| 1592_03795 | hypothetical protein                                             | WP_010779015.1 | 0.4725 |
| 1592_00894 | hypothetical protein                                             | WP_010781428.1 | 0.4745 |
| 1592_03739 | cell surface protein                                             | WP_010779071.1 | 0.4766 |
| 1592_01664 | phosphoribosylformylglycinamide synthase 2                       | WP_010780679.1 | 0.4767 |
| 1592_02851 | hypothetical protein                                             | WP_010779567.1 | 0.4768 |
| 1592_02899 | PTS system%2C mannose/fructose/sorbose family%2C IID component   | WP_010779519.1 | 0.4777 |
| 1592_03718 | hypothetical protein                                             | WP_010779092.1 | 0.4787 |
| 1592_02644 | hypothetical protein                                             | WP_010779742.1 | 0.4791 |
| 1592_03892 | hypothetical protein                                             | WP_010778918.1 | 0.4792 |
| 1592_03959 | hypothetical protein                                             | WP_010778853.1 | 0.4796 |
| 1592_03030 | PTS system%2C fructose subfamily%2C IIA component                | WP_010779387.1 | 0.4800 |
| 1592_03884 | hypothetical protein                                             | WP_010778926.1 | 0.4808 |
| 1592_00861 | hydantoinase/oxoprolinase                                        | WP_010781461.1 | 0.4834 |
| 1592_01268 | hypothetical protein                                             | WP_010781071.1 | 0.4855 |
| 1592_03175 | hypothetical protein                                             | WP_010778724.1 | 0.4897 |
| 1592_03027 | argininosuccinate synthase                                       | WP_010779390.1 | 0.4903 |
| 1592_02962 | hypothetical protein                                             | WP_010779456.1 | 0.4908 |
| 1592_02063 | acetyl-CoA carboxylase%2C biotin carboxyl carrier protein        | WP_010780306.1 | 0.4913 |
| 1592_00513 | hypothetical protein                                             | WP_010781793.1 | 0.4937 |
| 1592_02033 | hypothetical protein                                             | WP_010780335.1 | 0.4939 |
| 1592_00152 | hypothetical protein                                             | WP_010782138.1 | 0.4943 |
| 1592_03633 | PTS system galactitol-specific transporter subunit IIB           | WP_010779177.1 | 0.4959 |
| 1592_00101 | hypothetical protein                                             | WP_010782189.1 | 0.4966 |
| 1592_03701 | glutamate 5-kinase                                               | WP_010779109.1 | 0.4967 |
| 1592_03098 | hypothetical protein                                             | WP_010778801.1 | 0.4979 |
| 1592_00745 | TetR family transcriptional regulator                            | WP_010781573.1 | 0.4986 |
| 1592_04080 | hypothetical protein                                             | WP_010782373.1 | 0.4993 |
| 1592_01456 | hypothetical protein                                             | WP_010780884.1 | 0.4993 |
| 1592_03854 | hypothetical protein                                             | WP_010778956.1 | 0.4997 |
| 1592_00781 | trehalose operon repressor                                       | WP_010781537.1 | 0.4998 |
